# Supplementary material for: Dysregulated Retinoic Acid Signaling in the Pathogenesis of Pseudoexfoliation Syndrome
Source: MDPI journal article supplement (doi:10.3390/ijms23115977), 2022-05-26

**Table S1:** Differentially expressed genes in iris tissue of PEX patients as compared to normal donors. PCR-Array analysis (n=3). Verification by means of specific qRT-PCR primer assays (n=24). Asterisks indicate statistical significance (\*p<0.05, \*\*p<0.01, \*\*\*p<0.001; nd, not detected).

| Gene symbol | Gene name                                              | Fold up- / downregulation (mean $\pm$ SD) |                              |
|-------------|--------------------------------------------------------|-------------------------------------------|------------------------------|
|             |                                                        | RT <sup>2</sup> Profiler PCR array (n=3)  | qRT-PCR primer assays (n=24) |
| ADH1        | Alcohol dehydrogenase 1A (class I), alpha polypeptide  | -1.58 $\pm$ 0.79                          | -1.57 $\pm$ 0.61***          |
| ALDH1A1     | Aldehyde dehydrogenase 1 family, member A1             | -1.83 $\pm$ 0.15*                         | -1.93 $\pm$ 0.92***          |
| ALDH1A2     | Aldehyde dehydrogenase 1 family, member A2             | 1.47 $\pm$ 0.14                           | -1.10 $\pm$ 0.58             |
| ALDH1A3     | Aldehyde dehydrogenase 1 family, member A3             | 1.1 $\pm$ 0.68                            | 1.11 $\pm$ 0.77              |
| APOA2       | Apolipoprotein A-II                                    | 1.55 $\pm$ 0.49                           |                              |
| ASCL1       | Achaete-scute complex homolog 1 (Drosophila)           | 1.06 $\pm$ 0.76                           |                              |
| BHLHE40     | Basic helix-loop-helix family, member e40              | 1.45 $\pm$ 0.36                           |                              |
| BMP2        | Bone morphogenetic protein 2                           | -1.68 $\pm$ 0.62                          |                              |
| CD38        | CD38 molecule                                          | 1.99 $\pm$ 0.17*                          |                              |
| CDX1        | Caudal type homeobox 1                                 | 1.76 $\pm$ 0.72                           |                              |
| CHD7        | Chromodomain helicase DNA binding protein 7            | -1.39 $\pm$ 0.49                          |                              |
| CRABP1      | Cellular retinoic acid binding protein 1               | 1.11 $\pm$ 1.07                           | -1.50 $\pm$ 1.17*            |
| CRABP2      | Cellular retinoic acid binding protein 2               | -1.66 $\pm$ 1.39                          | -1.41 $\pm$ 0.64*            |
| CYP1B1      | Cytochrome P450, family 1, subfamily B, polypeptide 1  | -1.48 $\pm$ 0.21                          |                              |
| CYP26A1     | Cytochrome P450, family 26, subfamily A, polypeptide 1 | 1.03 $\pm$ 0.84                           |                              |
| CYP26B1     | Cytochrome P450, family 26, subfamily B, polypeptide 1 | -1.32 $\pm$ 1.34                          |                              |
| CYP26C1     | Cytochrome P450, family 26, subfamily C, polypeptide 1 | 1.59 $\pm$ 0.80                           |                              |
| DCX         | Doublecortin                                           | nd                                        |                              |
| DHRS3       | Dehydrogenase/reductase (SDR family) member 3          | -2.17 $\pm$ 0.83                          |                              |
| DHRS9       | Dehydrogenase/reductase (SDR family) member 9          | 1.16 $\pm$ 0.59                           |                              |
| DLX5        | Distal-less homeobox 5                                 | 1.63 $\pm$ 0.83                           |                              |
| EFNB1       | Ephrin-B1                                              | 1.22 $\pm$ 0.57                           |                              |
| EGR1        | Early growth response 1                                | 2.42 $\pm$ 0.77                           |                              |
| EPO         | Erythropoietin                                         | 2.72 $\pm$ 3.05                           |                              |
| FABP5       | Fatty acid binding protein 5 (psoriasis-associated)    | -1.15 $\pm$ 0.21                          |                              |
| FGF8        | Fibroblast growth factor 8 (androgen-induced)          | -1.04 $\pm$ 0.47                          |                              |
| FOXA1       | Forkhead box A1                                        | -1.13 $\pm$ 0.21                          |                              |
| FOXG1       | Forkhead box G1                                        | -1.72 $\pm$ 0.64                          |                              |

|         |                                                                  |                |                 |
|---------|------------------------------------------------------------------|----------------|-----------------|
| GATA4   | GATA binding protein 4                                           | -1.06 ± 1.05   |                 |
| GBX2    | Gastrulation brain homeobox 2                                    | 3.03 ± 1.15    |                 |
| GLI1    | GLI family zinc finger 1                                         | -1.02 ± 0.11   |                 |
| HNF1B   | HNF1 homeobox B                                                  | 1.71 ± 1.62    |                 |
| HOXA1   | Homeobox A1                                                      | 2.11 ± 0.71    |                 |
| HOXA5   | Homeobox A5                                                      | 1.67 ± 0.70    |                 |
| HOXB1   | Homeobox B1                                                      | 1.28 ± 0.38    |                 |
| HOXB4   | Homeobox B4                                                      | 2.84 ± 1.51    |                 |
| HSD17B2 | Hydroxysteroid (17-beta) dehydrogenase 2                         | -4.42 ± 2.1*   | -2.19 ± 0.88*** |
| ISL1    | ISL LIM homeobox 1                                               | -1.03 ± 0.81   |                 |
| JAG1    | Jagged 1                                                         | 1.12 ± 0.71    |                 |
| KLF4    | Kruppel-like factor 4 (gut)                                      | 2.54 ± 0.86    |                 |
| LEFTY1  | Left-right determination factor 1                                | -1.04 ± 0.66   |                 |
| LHX1    | LIM homeobox 1                                                   | 1.24 ± 1.17    |                 |
| LRAT    | Lecithin retinol acyltransferase                                 | 1.47 ± 0.87    | -1.17 ± 0.82    |
| MAFB    | V-maf musculoaponeurotic fibrosarcoma oncogene homolog B (avian) | 1.71 ± 0.91    |                 |
| MEIS2   | Meis homeobox 2                                                  | -1.8 ± 0.66    |                 |
| MSX2    | Msh homeobox 2                                                   | 1.28 ± 0.92    |                 |
| MYC     | V-myc myelocytomatosis viral oncogene homolog (avian)            | 1.13 ± 0.83    |                 |
| NANOG   | Nanog homeobox                                                   | 2.03 ± 0.74    |                 |
| NEUROD1 | Neurogenic differentiation 1                                     | 1.13 ± 0.96    |                 |
| NRIP1   | Nuclear receptor interacting protein 1                           | -1.45 ± 0.27   |                 |
| OLIG2   | Oligodendrocyte lineage transcription factor 2                   | 1.87 ± 0.76    |                 |
| OTX2    | Orthodenticle homeobox 2                                         | -2.98 ± 1.93   | -2.10 ± 1.23*** |
| PAX6    | Paired box 6                                                     | -1.49 ± 0.11*  |                 |
| PITX2   | Paired-like homeodomain 2                                        | -1.69 ± 1.04   |                 |
| PLAT    | Plasminogen activator, tissue                                    | 2.51 ± 0.95    |                 |
| PPARA   | Peroxisome proliferator-activated receptor alpha                 | -1.97 ± 0.35   | -1.13 ± 0.51    |
| PPARD   | Peroxisome proliferator-activated receptor delta                 | -1.84 ± 0.59*  | -1.06 ± 0.42    |
| PPARG   | Peroxisome proliferator-activated receptor gamma                 | -1.68 ± 0.45   | -2.19 ± 1.30*** |
| RARA    | Retinoic acid receptor, alpha                                    | -1.26 ± 0.21   | -1.55 ± 0.69*** |
| RARB    | Retinoic acid receptor, beta                                     | -1.80 ± 0.41** | -2.37 ± 1.23*** |
| RARG    | Retinoic acid receptor, gamma                                    | 1.05 ± 0.81    | -1.09 ± 0.43    |
| RARRES3 | Retinoic acid receptor responder (tazarotene induced) 3          | 1.18 ± 0.23    |                 |
| RBP1    | Retinol binding protein 1, cellular                              | -1.36 ± 0.38   | -1.48 ± 0.56**  |

|        |                                                          |                |                 |
|--------|----------------------------------------------------------|----------------|-----------------|
| RBP2   | Retinol binding protein 2, cellular                      | -1.46 ± 0.64   | -1.67 ± 0.81*** |
| RBP4   | Retinol binding protein 4, plasma                        | -1.51 ± 0.88   | -1.46 ± 0.59**  |
| RDH10  | Retinol dehydrogenase 10 (all-trans)                     | -1.65 ± 0.75   | -1.66 ± 0.59*** |
| RET    | Ret proto-oncogene                                       | -1.49 ± 0.97   |                 |
| RXRA   | Retinoid X receptor, alpha                               | -1.26 ± 0.29   | -1.56 ± 0.71*   |
| RXRB   | Retinoid X receptor, beta                                | -1.19 ± 0.47   | -1.10 ± 0.35    |
| RXRG   | Retinoid X receptor, gamma                               | 2.30 ± 1.47    | 1.77 ± 0.57***  |
| SHH    | Sonic hedgehog                                           | -2.14 ± 1.33   |                 |
| SOX2   | SRY (sex determining region Y)-box 2                     | -3.39 ± 0.58*  | -1.57 ± 1.26*   |
| SOX9   | SRY (sex determining region Y)-box 9                     | 1.06 ± 0.31    |                 |
| SREBF1 | Sterol regulatory element binding transcription factor 1 | 2.58 ± 1.42    | -1.44 ± 0.56**  |
| STRA6  | Stimulated by retinoic acid gene 6 homolog (mouse)       | -2.00 ± 1.15   | -1.82 ± 0.96*** |
| STRA8  | Stimulated by retinoic acid gene 8 homolog (mouse)       | -1.75 ± 0.50   |                 |
| TBX1   | T-box 1                                                  | -2.99 ± 1.37   |                 |
| TFAP2C | Transcription factor AP-2 gamma                          | -2.28 ± 0.47   |                 |
| TGFB2  | Transforming growth factor, beta 2                       | -1.89 ± 0.27** |                 |
| TGM2   | Transglutaminase 2                                       | -1.27 ± 0.48   |                 |
| TUBB3  | Tubulin, beta 3                                          | 4.64 ± 2.57    |                 |
| UCP1   | Uncoupling protein 1 (mitochondrial, proton carrier)     | 1.11 ± 0.51    |                 |
| WNT5A  | Wingless-type MMTV integration site family, member 5A    | -2.88 ± 0.76*  |                 |
| WNT8A  | Wingless-type MMTV integration site family, member 8A    | -3.9 ± 1.84    | -1.57 ± 0.61*** |

**Table S2:** Differentially expressed genes of the retinoic acid signaling pathway in iris, ciliary body, retina and choroid of PEX patients (n=23) as compared to normal donors (n=23) analyzed by real-time PCR. Data are given as fold change of expression in PEX as compared to control samples (\*p<0.05, \*\*p<0.01, \*\*\*p<0.001; nd, not detected).

| Gene symbol    | Gene name                                           | Fold change (mean) |              |         |         |
|----------------|-----------------------------------------------------|--------------------|--------------|---------|---------|
|                |                                                     | Iris               | Ciliary body | Retina  | Choroid |
| <b>ADH1</b>    | Alcohol dehydrogenase 1A (class I), alpha           | 0.64***            | 0.74*        | 0.64*   | 0.60**  |
| <b>ADH2</b>    | Alcohol dehydrogenase 1B (class I), beta            | 0.82               | 1.11         | 1.09    | 0.96    |
| <b>ADH3</b>    | Alcohol dehydrogenase 1C (class I), gamma           | 1.07               | 1.05         | 0.95    | 1.13    |
| <b>ADH4</b>    | Alcohol dehydrogenase 4 (class II), pi              | nd                 | nd           | nd      | nd      |
| <b>ADH5</b>    | Alcohol dehydrogenase 5 (class III), chi            | 1.12               | 1.08         | 0.97    | 1.03    |
| <b>ALDH1A1</b> | Aldehyde dehydrogenase 1 family, member A1          | 0.52***            | 0.62***      | 0.62*   | 0.69*   |
| <b>ALDH1A2</b> | Aldehyde dehydrogenase 1 family, member A2          | 0.91               | 1.19         | 1.02    | 0.90    |
| <b>ALDH1A3</b> | Aldehyde dehydrogenase 1 family, member A3          | 1.11               | 1.01         | 0.93    | 1.21    |
| <b>ALDH8A1</b> | Aldehyde dehydrogenase 8 family member A1           | 0.75               | 0.80         | 0.49*** | 0.62*** |
| <b>CRABP1</b>  | Cellular retinoic acid binding protein 1            | 0.67*              | 0.66*        | 0.53**  | 0.73**  |
| <b>CRABP2</b>  | Cellular retinoic acid binding protein 2            | 0.71*              | 0.54***      | 0.57*   | 0.55*   |
| <b>CYP26A1</b> | Cytochrome P450, family 26, subfamily A1            | nd                 | nd           | nd      | nd      |
| <b>CYP26B1</b> | Cytochrome P450, family 26, subfamily B1            | 0.92               | 0.92         | 1.17    | 0.98    |
| <b>CYP26C1</b> | Cytochrome P450, family 26, subfamily C1            | nd                 | nd           | nd      | nd      |
| <b>LRAT</b>    | Lecithin retinol acyltransferase                    | 0.86               | 1.35         | 0.91    | 1.02    |
| <b>RARA</b>    | Retinoic acid receptor, alpha                       | 0.65***            | 0.69***      | 0.70    | 1.24    |
| <b>RARB</b>    | Retinoic acid receptor, beta                        | 0.42***            | 0.70*        | 0.62**  | 0.69*   |
| <b>RARG</b>    | Retinoic acid receptor, gamma                       | 0.91               | 1.08         | 1.19    | 0.98    |
| <b>RBP1</b>    | Retinol binding protein 1, cellular                 | 0.67**             | 0.65**       | 0.72    | 0.71**  |
| <b>RBP2</b>    | Retinol binding protein 2, cellular                 | 0.60***            | 0.61***      | 0.67**  | 0.66*** |
| <b>RBP3</b>    | Retinol binding protein 2, interstitial             | 1.18               | 1.23         | 1.13    | 0.96    |
| <b>RBP4</b>    | Retinol binding protein 4, plasma                   | 0.68**             | 0.68**       | 0.62**  | 0.52**  |
| <b>RDH5</b>    | Retinol dehydrogenase 5                             | 1.07               | 1.14         | 0.89    | 1.14    |
| <b>RDH10</b>   | Retinol dehydrogenase 10                            | 0.60***            | 0.68*        | 0.59*   | 0.77    |
| <b>RORA</b>    | RAR related orphan receptor A                       | 0.66**             | 0.81**       | 0.41*** | 0.87    |
| <b>RORB</b>    | RAR related orphan receptor B                       | 0.85               | 0.83         | 0.59**  | 1.20    |
| <b>RORC</b>    | RAR related orphan receptor C                       | 0.51***            | 0.69*        | 0.61**  | 0.69*   |
| <b>RXRA</b>    | Retinoid X receptor, alpha                          | 0.64*              | 0.74*        | 0.64*   | 0.68*   |
| <b>RXRB</b>    | Retinoid X receptor, beta                           | 0.91               | 0.93         | 0.76*   | 0.73*   |
| <b>RXRG</b>    | Retinoid X receptor, gamma                          | 1.77***            | 1.52**       | 0.92    | 1.23    |
| <b>STRA6</b>   | Signaling receptor and transporter of retinol STRA6 | 0.55***            | 0.75***      | 0.60*   | 0.81    |
| <b>TTR</b>     | Transthyretin                                       | 0.88               | 1.11         | 0.92    | 1.22    |

**Table S3.** SYBR green primers used for qRT-PCR ( $T_{an}$ , annealing temperature).

| Gene symbol | Accession      | Product length | $T_{an}$ | MgCl <sub>2</sub> | Sequence 5' - 3'                                      |
|-------------|----------------|----------------|----------|-------------------|-------------------------------------------------------|
| ADH1        | NM_000667.4    | 198            | 61       | 3.0               | TCACCAGTCTCCTGGTCTGC<br>CCACGTGGTCATCTGTGCC           |
| ADH2        | NM_000668.6    | 148            | 62       | 3.0               | ATCAGCTGGGGAATTGAAGCCA<br>AGGGTCCCCTCCACTGGGAT        |
| ADH3        | NM_000669.5    | 167            | 61       | 3.0               | TGGACGCACGTGGAAAGGAG<br>TTCCAGAGCGAAGCAGGTCA          |
| ADH4        | NM_000670.4    | 270            | 62       | 3.0               | CACGGAACTCCCTGGGTAGG<br>AGGCGATGGCTGCTTTGCATT         |
| ADH5        | NM_000671.4    | 258            | 64       | 3.5               | GGGCTGTAAAGTGGCTGGTGC<br>GCTACTCCAACCACGACGCTG        |
| ALDH1A1     | NM_000689.5    | 209            | 63       | 3.0               | TGCGCATTGCCAAAGAGGAGA<br>CTGGGCACTTACCACGCCAT         |
| ALDH1A2     | NM_003888.4    | 195            | 62       | 3.0               | TCCAGCAAGATAGAGATGCCCCG<br>ACACACCTGTTCTCCTGTGGCT     |
| ALDH1A3     | NM_000693.4    | 212            | 62       | 3.0               | TAAGCCCGACGTGGACAAGG<br>TACAGCCCTCCAGGTGCATGA         |
| ALDH8A1     | NM_170771.2    | 177            | 59       | 3.0               | CAGACAGTGGTGGGGACAAC<br>TGCAATACACTTCCCCTGTTGA        |
| COL1A1      | NM_000088.3    | 127            | 62       | 3.0               | CGAAGACATCCCACCAATCACC<br>GATCACGTCATCGCACAACACC      |
| COL3A1      | NM_000090.3    | 239            | 64       | 3.0               | GGCTACTTCTCGCTCTGCTTCATC<br>TGGGCAAACCTGCACAACATTCTCC |
| COL4A1      | NM_001845.6    | 116            | 63       | 3.0               | CAGAGATGGTGTGTCAGGAGTG<br>TGTCACCTTTGAGCCGCAAGTC      |
| CRABP1      | NM_004378.3    | 270            | 62       | 3.0               | AGGTCGGAGAAGGCTTTGAGGA<br>TATTCCTCAGGGGAGCCTGCAT      |
| CRABP2      | NM_001878.4    | 163            | 59       | 3.0               | CTCCTCCCCAACCTTGAAGT<br>GGAATTGCTCAAAGTGCTGG          |
| CTGF        | NM_001901.4    | 250            | 62       | 3.0               | CCTGGAAGAGAACATTAAGAAGGGCA<br>GTTGTAATGGCAGGCACAGGTC  |
| CYP26A1     | NM_000671.4    | 102            | 64       | 3.5               | GCTGCGATCAAGCTCTGGGAC<br>TTCCCCAAAGAAGGGGAAGCC        |
| CYP26B1     | NM_019885.3    | 249            | 63       | 3.0               | CGCAAGATCCTCATGGGCGAG<br>CGCCTCCTGGTACACGTTGA         |
| CYP26C1     | NM_183374.3    | 91<br>102      | 64       | 3.5               | ACGGGCTGCGGCTCTTTTTC<br>AAGCCGTGTCCTAGAGCGCA          |
| ELN         | NM_000501.2    | 197            | 62       | 3.0               | AGGCAAACCTCTTAAGCCAGTTCC<br>CAGACACTCCTAAGCCACCAACTC  |
| FBLN1       | NM_006487.3    | 231            | 62       | 3.5               | CTGCGAGTACAGCCTCATGG<br>AAGCAGGAGCAGACCACCTC          |
| FBLN2       | NM_001998.3    | 78             | 65       | 4.5               | AGGACACAGACCCCAACTCTGTC<br>AAGTCTCGATCAGGTCCTTGGTG    |
| FBLN3       | NM_001039349.3 | 245            | 62       | 3.5               | TGAACAGCCTCAGCAGGAAAC<br>AGCCTGCTGCACACTGGATAC        |
| FBLN4       | NM_016938.3    | 141            | 64       | 3.0               | ACAACCGCTCCTGTGTTGATGTG<br>TATCACTGCAGGAGAAGCCATCC    |
| FBLN5       | NM_006329.4    | 99             | 61       | 3.5               | CGCTGTGACCCAGGATATGAAC                                |

|         |             |     |    |     |                                                       |
|---------|-------------|-----|----|-----|-------------------------------------------------------|
|         |             |     |    |     | CACACACTCATGTTGGCAGAGG                                |
| FBLN6   | NM_031935.3 | 189 | 63 | 3.5 | TGGTTGCATACACACAGGATGGAG<br>TCCCATTGGCACTGTAGGATGAGG  |
| FBLN7   | NM_153214.2 | 245 | 64 | 3.5 | GAAGAGCTGTGAGGATGTGGATG<br>TGGAAGGCAGAGAGAGGTAATGG    |
| FBN1    | NM_000138.5 | 184 | 64 | 3.5 | GAATGCAAGAACCTCATTGGCAC<br>TGGCGGTAAACCCATCATTACAC    |
| FN1     | NM_054034.3 | 205 | 62 | 3.5 | GATGTTCTGTCAGCTGTTTACC<br>TTGAGTTGCCACCGTAAGTCTG      |
| ISLR2   | NM_020851.3 | 119 | 62 | 3.0 | CGCTGTCACACTTGCAACTC<br>ACAAGCAATGGAGTCGGGC           |
| GAPDH   | NM_002046.6 | 194 | 64 | 3.0 | AAGGTCGGAGTCAACGGATTTGG<br>ATGACAAGCTTCCCGTTCTCAGC    |
| HPRT1   | NM_000194.3 | 229 | 58 | 3.5 | TGCTGACCTGCTGGATTACA<br>CCTGACCAAGGAAAGCAAAG          |
| HSD17B2 | NM_002153.3 | 163 | 62 | 3.0 | AAGGGAGGCTGGTGAATGTCAG<br>AAGCCTCCAGGTTGGATGGAAG      |
| LOX     | NM_002317.3 | 104 | 62 | 3.5 | CAGATTTCTTACCCAGCCGACC<br>GGCATCAAGCAGGTCATAGTGG      |
| LOXL1   | NM_005576.2 | 142 | 62 | 3.5 | ACTACGATGTGCGGGTGCTACTG<br>TGGCTGAACTCGTCCATGCTGTG    |
| LTBP1   | NM_000627.4 | 140 | 65 | 3.0 | TGAGGAGTTACAGGCTGAGGAATG<br>TTACATCGACACAGGTCATCTTGG  |
| LTBP2   | NM_000428.3 | 129 | 65 | 3.0 | TGAGAAGGGCTGCCAAGATGTGG<br>CCGTCTTCATTACCCAGTACCC     |
| LRAT    | NM_004744.5 | 135 | 61 | 3.0 | ACTGCGAGCACTTCGTGACC<br>ACGCCAATCCCAAGACTGCT          |
| MFAP2   | NM_017459.3 | 179 | 62 | 3.0 | CCAGCAGCAAGTCCAACAGGAAG<br>GGCTGTAGAAGCAGACCTCGTTG    |
| MMP2    | NM_004530.6 | 179 | 63 | 3.5 | CTCTCCACTGCCTTCGATACACC<br>CTGGGAGGAGTACAGTCAGCATC    |
| NR1H2   | NM_007121.7 | 189 | 63 | 3.0 | GCGCTACAACCACGAGACAGAG<br>GCCGAGAAGATGTTGATGGCGA      |
| NR1H3   | NM_005693.4 | 186 | 63 | 3.0 | CGAGACTTCTGGACAGGAACTG<br>CACCGCAGAGTCAGGAGGAATG      |
| OTX2    | NM_172337.3 | 161 | 62 | 3.5 | AGTCTGACCACTTCGGGTATGG<br>TCTCGCATGAAGATGTCTGGGT      |
| PLAT    | NM_033011.4 | 192 | 62 | 3.5 | TGTCAGACTGTACCCATCCAGC<br>ATGATGCCCAACCAAAGTCATGC     |
| PPARA   | NM_005036.6 | 130 | 62 | 3.0 | AGGAGACTGAACTGACCACAT<br>ACCATTAAGGCAAAACTGTACCCT     |
| PPARG   | NM_138712.5 | 90  | 64 | 3.0 | ACTTGTA TAGCAGAGAGTCCTGA<br>ATTTCTTAGGTGTCAGATTTTCCCT |
| PPARD   | NM_006238.5 | 181 | 61 | 3.0 | CATGCCCCAGGATCACTCTC<br>GTATCCTCAGCACCAGACCC          |
| RARA    | NM_000964.3 | 242 | 63 | 3.0 | GGGGGAATCCTGAATCGAGCTG<br>GGTTGGGGGATGTCTCAAGAGC      |
| RARB    | NM_000965.5 | 230 | 61 | 3.0 | AACGTCTGCCTGGTTTCACTGG<br>TTCCAAAGGCAGGAGCTGGTTG      |
| RARG    | NM_000966.6 | 152 | 61 | 3.0 | TCGCCGAAGCATCCAGAAGAAC<br>TCCGGTCATTTCGCACAGCTTC      |

|        |                |     |    |     |                                                    |
|--------|----------------|-----|----|-----|----------------------------------------------------|
| RBP1   | NM_002899.5    | 148 | 59 | 3.0 | CTCCTTCTCACCCTTCTGCA<br>CTCCAGTCACTCCCCGAAAT       |
| RBP2   | NM_004164.2    | 247 | 59 | 3.0 | TGGAACCTGGGAGATGGAGAGT<br>GGTGACCAGTGCCTTAACATGC   |
| RBP3   | NM_002900.2    | 205 | 63 | 3.0 | CATGGGCACCTCCGCCTTAG<br>CACATCCTTGTCGGCACCGT       |
| RBP4   | NM_006744.4    | 165 | 59 | 3.0 | ACACGAAGGAGTAGCTGTCA<br>ACCCTGCCAAGTTCAAGATG       |
| RDH5   | NM_001199771.1 | 138 | 63 | 3.0 | CCAATGGTGGGGGCTACTGTG<br>CCAGGTTGGTCACAGGGGTTC     |
| RDH10  | NM_172037.5    | 165 | 63 | 3.0 | ATGGTGCGCCACATCTACCG<br>GCGGACTCTTTCAGCCGTCA       |
| RORA   | NM_134261.3    | 177 | 62 | 3.0 | AATGCCTTGCCGTAGGGATGT<br>TGGCCGAGATGTTGTAGGTGG     |
| RORB   | NM_006914.4    | 195 | 59 | 3.0 | AAGGGATGGTTTTCTCGGCAG<br>GATCCCAGAGGACTTATCGCCA    |
| RORC   | NM_005060.4    | 154 | 59 | 3.0 | TGGCTGCAAAGAAGACCCACAC<br>CAGGAGTAGGCCGCGTTACA     |
| RXRA   | NM_002957.5    | 178 | 62 | 3.0 | GAGTTAGTCGCAGACATGGACAC<br>TCAGGGTGCTGATGGGAGAATG  |
| RXRB   | NM_021976.5    | 178 | 61 | 3.0 | CTGCCGCTATCAGAAAGTGCCTG<br>GCCCTGGTCACTCTTCTGTTCC  |
| RXRG   | NM_006917.5    | 205 | 61 | 3.0 | CAGCTCTCAGCTAAATGTGGTC<br>CTTGAAGAACCCTTTGCAGCCT   |
| SOX2   | NM_003106.4    | 131 | 60 | 3.0 | GAAGGATAAGTACACGCTGCCC<br>CGTTCATGTGCGCGTAACTGTC   |
| SREBF1 | NM_004176.5    | 175 | 63 | 3.0 | GTGACCTCGCAGATCCAGCAG<br>CACTCACCAGGGTTCGGCAAAG    |
| STRA6  | NM_022369.4    | 119 | 59 | 3.0 | TTGGAGCCTCAGTTTTCCCA<br>TGCTGCTGTTTTCATGGTCC       |
| TGFB1  | NM_000660.7    | 121 | 60 | 3.0 | CTGCGGATCTCTGTGTCATTGG<br>CGGGCAAAGGAATAGTGCAGAC   |
| TGFBR2 | NM_003242.6    | 174 | 62 | 3.0 | TCGGTCTATGACGAGCAGCG<br>GTGGAACTTGACTGCACCGTT      |
| TIMP2  | NM_003255.4    | 117 | 63 | 3.5 | TGTTCCCTCCCTCAAAGACTGAC<br>CCACCTACCTCCAAAATCCTTCC |
| TTR    | NM_000371.3    | 108 | 62 | 3.0 | TGTCTGAGGCTGGCCCTACG<br>ACACATGCACGGCCACATTG       |
| WNT8A  | NM_058244.4    | 150 | 61 | 3.0 | TCTTCAGCTCTCCACCCACAAC<br>TTGTTTGACCCATCACAGCCAC   |

**Table S4.** Primary antibodies

| Antibody (clone), Host species | Antibody concentration | Application               | Antibody source  |
|--------------------------------|------------------------|---------------------------|------------------|
|                                |                        |                           |                  |
| Actin beta (AC-15), mouse      | 1:10000                | Western Blotting          | Sigma-Aldrich    |
| Elastin (B-10), mouse          | 1:250                  | Western Blotting          | Santa Cruz       |
| Fibrillin-1 (MAB 26), mouse    | 1:2500                 | Western Blotting          | Merck/Millipore  |
| LOXL1, rabbit                  | 1:1000                 | Western Blotting          | LSBio            |
| Phospho-Smad2 (138D4), rabbit  | 1:1000                 | Western Blotting          | Cell Signaling   |
| RAR $\alpha$ (C-20), rabbit    | 1:2500                 | Western Blotting          | Santa Cruz       |
| Smad2 (L16D3), mouse           | 1:1000                 | Western Blotting          | Cell Signaling   |
| Fibrillin-1, rabbit            | 1:2000                 | Immunocytochemistry       | Dieter Reinhardt |
| LOXL1, mouse (B01P)            | 1:50                   | Immunohisto/cytochemistry | Abnova           |
| LOXL1, rabbit                  | 1:1000                 | Immunohisto/cytochemistry | Takako Sasaki    |
| LTBP-1, mouse (H-1)            | 1:50                   | Immunocytochemistry       | Santa Cruz       |
| RAR $\alpha$ (C-20), rabbit    | 1:500                  | Immunohistochemistry      | Santa Cruz       |
| RXR $\alpha$ (4E9), mouse      | 1:50                   | Immunohistochemistry      | Merck/Millipore  |
| RXR $\alpha$ (EPR7106), rabbit | 1:200                  | Immunohistochemistry      | Abcam            |
| Smad2/3 (D7G7), rabbit         | 1:300                  | Immunohisto/cytochemistry | Cell Signaling   |
| Tropoelastin, rabbit           | 1:200                  | Immunocytochemistry       | EPC              |
| Phalloidin, Alexa Fluor 555    | 1:50                   | Immunocytochemistry       | Cell Signaling   |



**Figure S1: Comparative analysis of retinoic acid pathway components in ocular tissues of normal and PEX eyes with different stages of disease.** Relative expression levels of transcripts for STRA6 (signaling receptor and transporter of retinol 6), RBP1 (retinol binding protein 1), ADH1 (alcohol dehydrogenase 1), ALDH1A1 (aldehyde dehydrogenase 1 A1) and RARA (retinoic acid receptor alpha) in ciliary body tissues obtained from normal human donors as control (n=23) and patients with early stages (n=7) and late stages (n=17) of PEX syndrome analyzed by real-time PCR. Expression levels were consistently reduced in all disease stages including early stages. Expression levels were normalized relative to GAPDH and HPRT1. Data are given as fold change of expression in PEX as compared to control samples set to 1 (\*p<0.05, \*\*p<0.01, \*\*\*p<0.001).

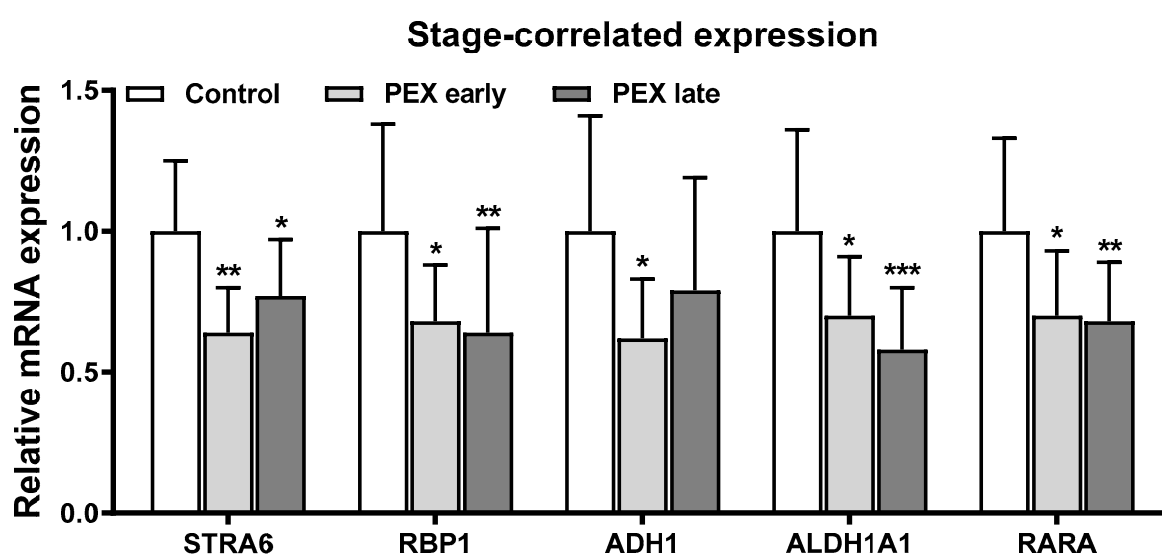

**Figure S2:** Correlation of RBP3 (retinol-binding protein 3), RBP4 (retinol-binding protein 4) and TTR (transthyretin) levels and total protein concentrations in aqueous humor samples of PEX and control eyes.

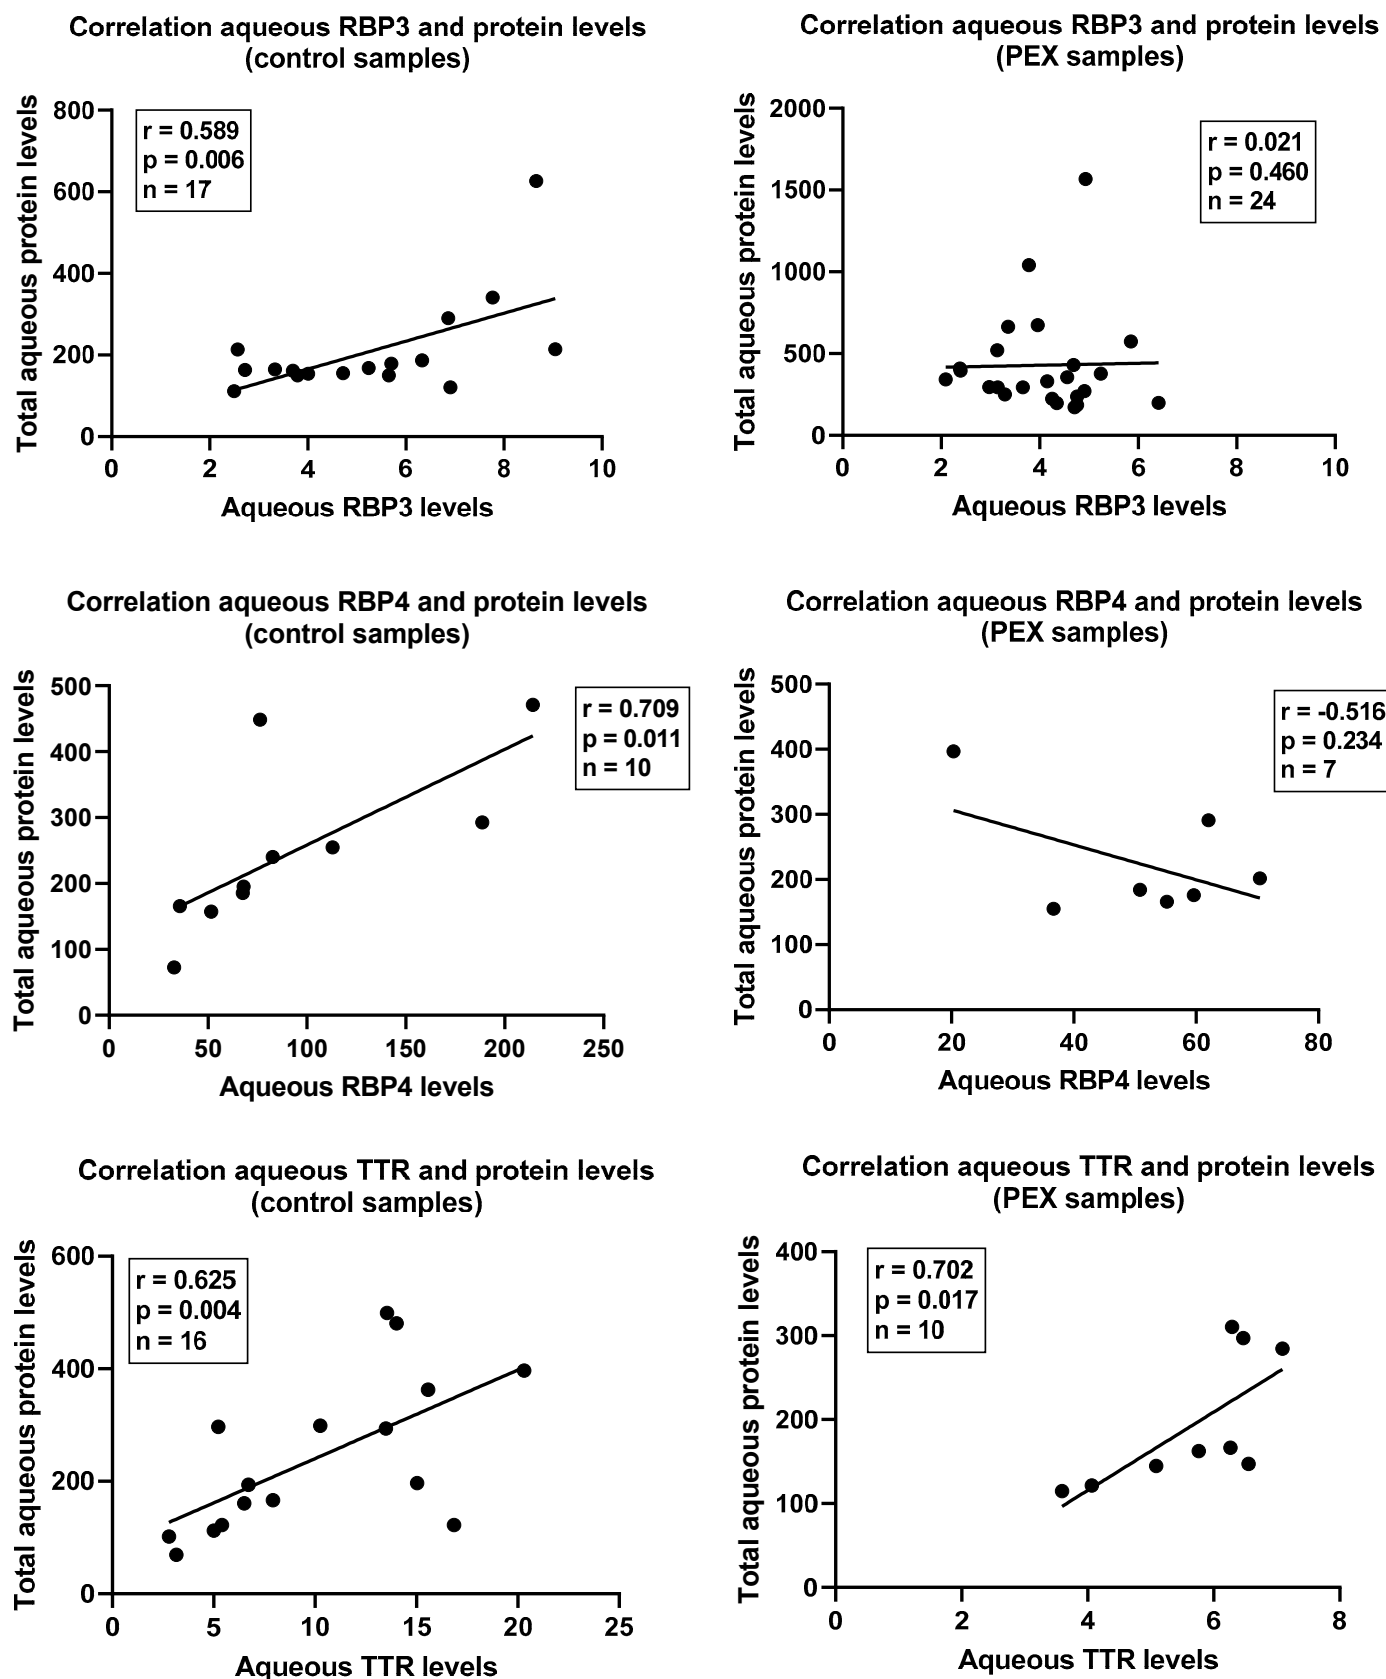

**Figure S3. Dose-response effects of retinoic acid signaling activation by all-trans retinoic acid.** Real-time PCR analysis of LOXL1 (lysyl oxidase-like 1), ELN (elastin) and FBN1 (fibrillin-1) expression in cultured human Tenon's capsule fibroblasts (hTCF) without stimulation (control, Ctrl) and in response to various concentration of all-*trans* retinoic acid (ATRA) (n=4). Expression levels were normalized relative to GAPDH and HPRT1. Data are given as fold change of expression in PEX as compared to untreated control samples set to 1 (\*p<0.05, \*\*p<0.01, \*\*\*p<0.001).

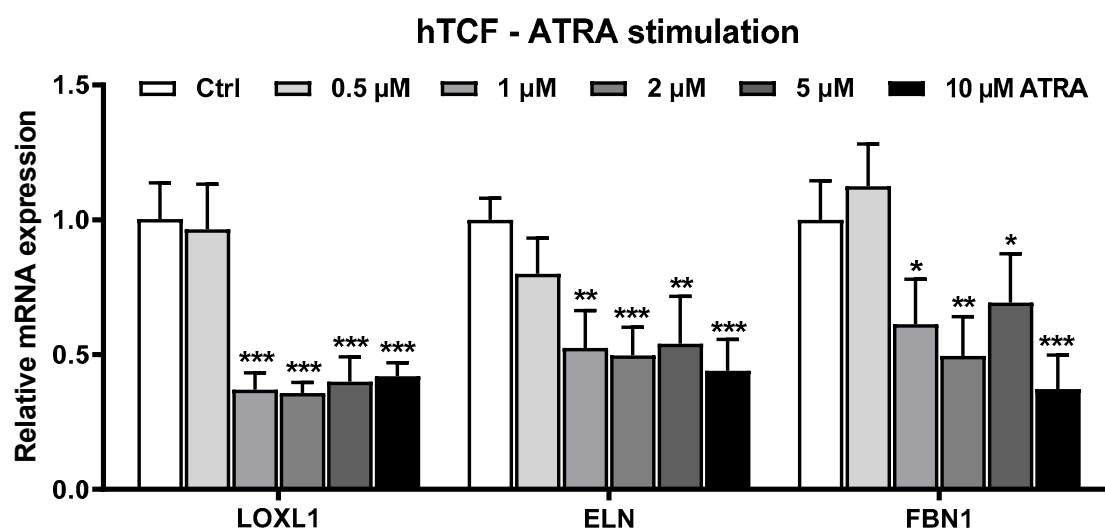

**Figure S4. Dose-response effects of retinoic acid signaling activation by synthetic retinoids.**

Real-time PCR analysis of LOXL1 (lysyl oxidase-like 1), ELN (elastin), FBN1 (fibrillin-1) and LTBP1 (latent transforming growth factor beta binding protein 1) expression in cultured human Tenon's capsule fibroblasts without stimulation (control, Ctrl) and in response to 2  $\mu$ M all-*trans* retinoic acid (ATRA, pan-RAR agonist), 0.01-10  $\mu$ M AM 80 (RAR $\alpha$  agonist), AC 261066 (RAR $\beta$  agonist), CD 1530 (RAR $\gamma$  agonist), LGD 1069 (pan-RXR agonist) and CD 3254 (RXR $\alpha$  agonist) (n=4). Expression levels were normalized relative to GAPDH and HPRT1. Data are given as fold change of expression in PEX as compared to untreated control samples set to 1 (\*p<0.05, \*\*p<0.01, \*\*\*p<0.001).

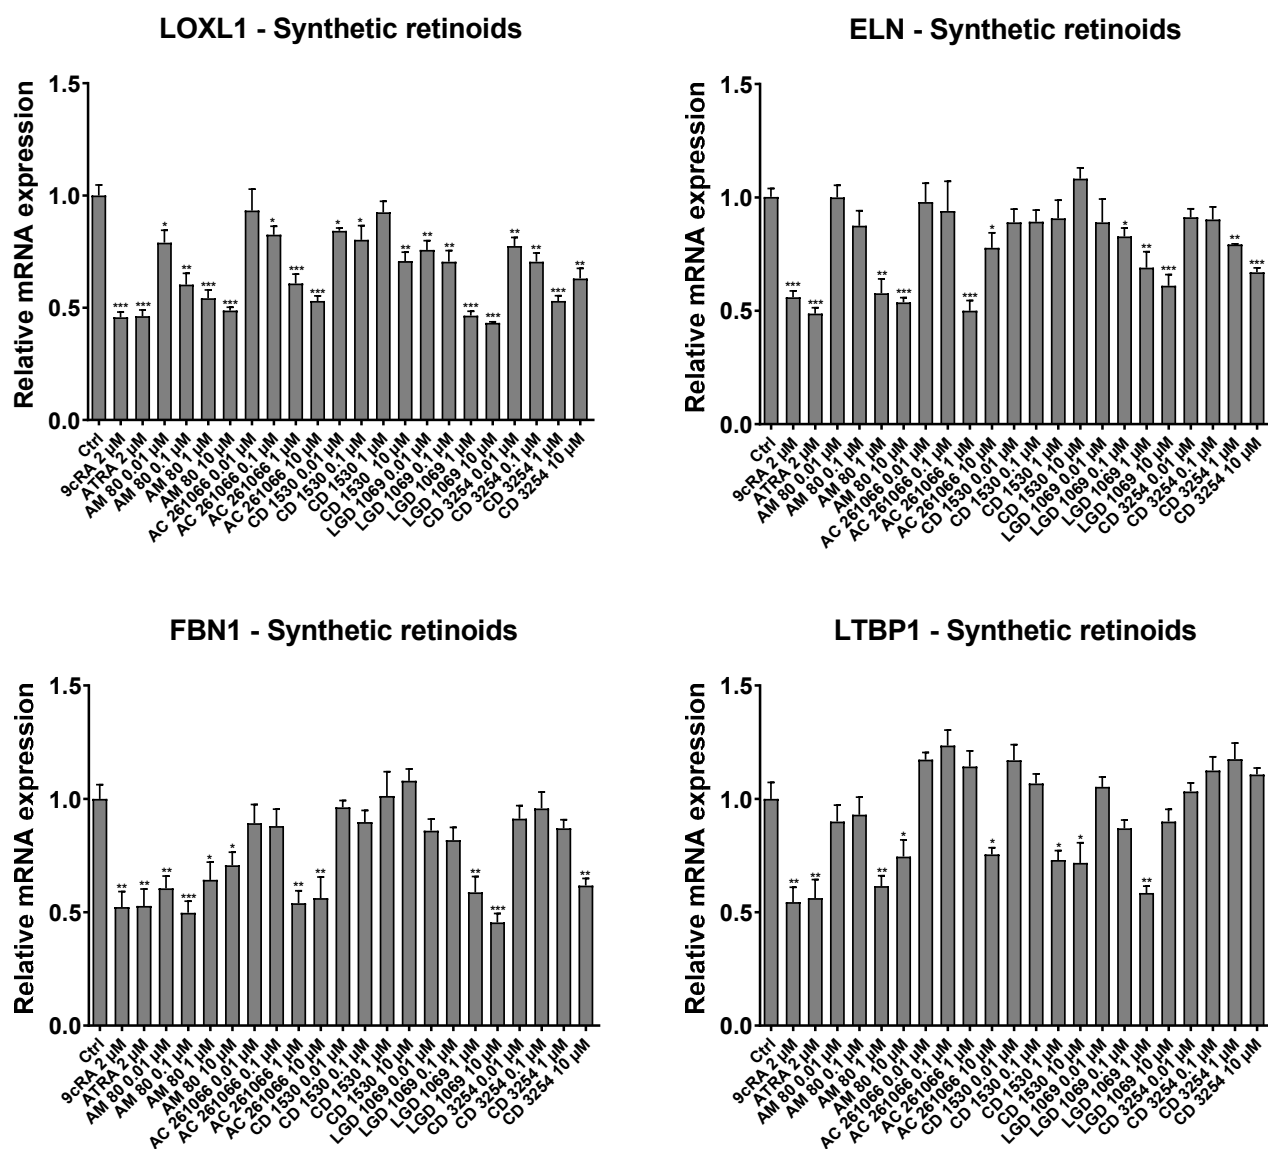

Supplement: s1 [file s1]
